# Supplementary material
Source: HighWire-hosted journal article supplement (https://bmjopen.bmj.com/content/12/6/e061614)
Supplement: inline-supplementary-material-2 [file inline-supplementary-material-2.pdf]

| Database       | Queries                                                                                                                                                                                                                                                                                                                                                                                                                                                                                                                                                                                                       |
|----------------|---------------------------------------------------------------------------------------------------------------------------------------------------------------------------------------------------------------------------------------------------------------------------------------------------------------------------------------------------------------------------------------------------------------------------------------------------------------------------------------------------------------------------------------------------------------------------------------------------------------|
| PubMed         | ((("spinal meningioma"*[Title] NOT "case report"[All Fields]) AND 2000/01/01:3000/12/31[Date - Publication] AND "english"[Language] AND ("loattrfull text"[Filter] AND "humans"[MeSH Terms] AND "english"[Language])) OR (((("spin"*[All Fields] AND ("meningioma"[MeSH Terms] OR "meningioma"[All Fields] OR "meningiomas"[All Fields])) NOT ("case reports"[Publication Type] OR "case report"[All Fields])) AND 2000/01/01:3000/12/31[Date - Publication] AND ("loattrfull text"[Filter] AND "humans"[MeSH Terms] AND "english"[Language]))) AND ((fft[Filter] AND (humans[Filter] AND (english[Filter]))) |
| Web of Science | ((ALL=("spinal meningioma") AND PY=(2000-2500) AND LA=(English) NOT TS=("CASE REPORT")) NOT (TASCA=("VETERINARY SCIENCES") OR DT=("EDITORIAL MATERIAL" OR "LETTER" OR "MEETING ABSTRACT"))) OR ((TI=(spinal AND meningioma*) AND PY=(2000-2500) AND LA=(English) NOT TI=(case report)) NOT (TASCA=("VETERINARY SCIENCES") OR DT=("EDITORIAL MATERIAL" OR "LETTER" OR "MEETING ABSTRACT")))                                                                                                                                                                                                                    |
| Embase         | spinal meningioma*':ab,ti NOT 'case report' AND [2000-2021]/py NOT ('spinal meningioma*':ab,ti NOT 'case report' AND [2000-2021]/py) AND ('animal experiment'/de OR 'animal model'/de OR 'animal tissue'/de OR 'nonhuman'/de)                                                                                                                                                                                                                                                                                                                                                                                 |
